# Supplementary material
Source: ML conference proceedings conference paper supplement (https://openaccess.thecvf.com/content/CVPR2023/html/Wang_Hard_Patches_Mining_CVPR_2023_paper.html)
Supplement: Supplementary file 1 [file Wang_Hard_Patches_Mining_CVPR_2023_supplemental.pdf]

# Hard Patches Mining for Masked Image Modeling

## – Supplementary Material –

Haochen Wang<sup>1,3</sup> Kaiyou Song<sup>2</sup> Junsong Fan<sup>1,4</sup> Yuxi Wang<sup>1,4</sup> Jin Xie<sup>2</sup> Zhaoxiang Zhang<sup>1,3,4</sup>

<sup>1</sup>Center for Research on Intelligent Perception and Computing,  
National Laboratory of Pattern Recognition, Institute of Automation, Chinese Academy of Sciences

<sup>2</sup>Megvii Technology <sup>3</sup>University of Chinese Academy of Sciences

<sup>4</sup>Centre for Artificial Intelligence and Robotics,  
Hong Kong Institute of Science & Innovation, Chinese Academy of Science

{wanghaochen2022, junsong.fan, zhaoxiang.zhang}@ia.ac.cn

{songkaiyou, xiejin}@megvii.com yuxiwang93@gmail.com

## Supplementary Material

In this supplementary material, we first provide mode implementation details for reproducibility in Sec. **A**. Next, in Sec. **B**, we ablate baselines (*i.e.*, BEiT [1] and iBOT [29]) and decoder designs. The pseudo-code of the easy-to-hard mask generation in a Pytorch-like style is provided in Sec. **C**. Finally, in Sec. **D**, we provide both visual and quantitative evidence of our key assumption: *discriminative patches are usually hard to reconstruct*.

### A. Implementation Details

**ViT Architecture.** We follow the standard vanilla ViT [9] architecture used in MAE [11] as the backbone, which is a stack of Transformer blocks [23]. Following MAE [11] and UM-MAE [15], we use the sine-cosine positional embedding. For the downstream classification task, we use features globally averaged from the encoder output for both end-to-end fine-tuning, linear probing, and  $k$ -NN classification.

**Decoder Design.** Our HPM contains two decoders, *i.e.*, the image reconstructor and the loss predictor. These two decoders share the architecture, and each decoder is a stack of Transformer blocks [23] followed by a linear projector.

**Effective Training Epochs.** Following iBOT [29], we take the effective training epochs as the metric of the training schedule, due to extra computation costs brought by multi-crop [2] augmentation, which is a widely used technique for contrastive methods. Specifically, the effective training epochs are defined as the actual pre-training epochs multiplied with a scaling factor  $r$ . For instance, DINO [3] is trained with 2 global  $224 \times 224$  crops and 10 local  $96 \times 96$  crops, and thus  $r = 2 + (96/224)^2 \times 10 \approx 4$ . More details

Table S1. **Pre-training settings.** By default, we use ViT-B/16 [9] as the backbone and apply 200 epochs pre-training.

| config                  | value                              |
|-------------------------|------------------------------------|
| optimizer               | AdamW [19]                         |
| base learning rate      | 1.5e-4                             |
| weight decay            | 0.05                               |
| momentum                | $\beta_1, \beta_2 = 0.9, 0.95$ [4] |
| layer-wise lr decay [6] | 1.0                                |
| batch size              | 4096                               |
| learning rate schedule  | cosine decay [20]                  |
| warmup epochs           | 10 (ViT-B), 40 (ViT-L)             |
| training epochs         | 200                                |
| augmentation            | RandomResizedCrop                  |

and examples can be found in [29].

### A.1. ImageNet Classification

For all experiments in this paper, we take ImageNet-1K [21], which contains 1.3M images for 1K categories, as the pre-trained dataset. By default, we take ViT-B/16 [9] as the backbone and it is pre-trained 200 epochs followed by 100 epochs of end-to-end fine-tuning. Implementation details can be found in Tab. **S1**, Tab. **S2**, and Tab. **S3**. Most of the configurations are borrowed from MAE [11]. The linear learning rate scaling rule [10] is adopted:  $lr = lr_{\text{base}} \times \text{batch\_size} / 256$ . For supervised training from scratch, we simply follow the fine-tuning setting without another tuning.

We follow the linear probing setting of MoCo v3 [5]. We do not use mixup [27], cutmix [26], drop path [14], and color jitter. The  $k$ -NN classification settings are borrowed from DINO [3]. All images are first resized to  $256 \times 256$  and then center-cropped to  $224 \times 224$ . We report the best result among  $k = 10, 20, 100, 200$ .

Table S2. **Fine-tuning settings.** By default, we use ViT-B/16 [9] as the backbone and apply 100 epochs fine-tuning on ImageNet-1K [21] after pre-training.

| config                  | value                           |
|-------------------------|---------------------------------|
| optimizer               | AdamW [19]                      |
| base learning rate      | 5e-4                            |
| weight decay            | 0.05                            |
| momentum                | $\beta_1, \beta_2 = 0.9, 0.999$ |
| layer-wise lr decay [6] | 0.8                             |
| batch size              | 1024                            |
| learning rate schedule  | cosine decay [20]               |
| warmup epochs           | 5                               |
| training epochs         | 100 (ViT-B/16), 50 (ViT-L/16)   |
| augmentation            | RandAug (9, 0.5) [8]            |
| label smoothing [22]    | 0.1                             |
| mixup [27]              | 0.8                             |
| cutmix [26]             | 1.0                             |
| drop path [14]          | 0.1                             |

Table S3. **Linear probing settings.** By default, we use ViT-B/16 [9] as the backbone and apply 100 epochs linear probing on ImageNet-1K [21] after pre-training.

| config                 | value             |
|------------------------|-------------------|
| optimizer              | SGD               |
| base learning rate     | 1e-3              |
| weight decay           | 0                 |
| momentum               | $\beta_1 = 0.9$   |
| batch size             | 4096              |
| learning rate schedule | cosine decay [20] |
| warmup epochs          | 10                |
| training epochs        | 100               |
| augmentation           | RandomResizedCrop |

Table S4. Ablation study on different **decoder designs.** The speedup is evaluated under 8 Tesla V100 GPUs with 32 images with resolution  $224 \times 224$  per GPU. The default settings of our proposed HPM are highlighted in color.

| # blocks | speedup | fine-tune    | linear | $k$ -NN |
|----------|---------|--------------|--------|---------|
| 1        | 1.94×   | 82.67        | 39.83  | 16.83   |
| 2        | 1.68×   | 82.50        | 46.74  | 22.63   |
| 4        | 1.37×   | 82.75        | 53.95  | 33.60   |
| 8        | 1.00×   | <b>82.95</b> | 54.92  | 36.09   |
| 12       | 0.76×   | 82.84        | 54.83  | 35.93   |

  

| # dim | speedup | fine-tune    | linear | $k$ -NN |
|-------|---------|--------------|--------|---------|
| 128   | 1.31×   | 82.74        | 42.51  | 17.67   |
| 256   | 1.18×   | 82.80        | 52.39  | 29.46   |
| 512   | 1.00×   | <b>82.95</b> | 54.92  | 36.09   |
| 1024  | 0.61×   | 82.81        | 54.01  | 36.54   |

## A.2. COCO Object Detection and Segmentation

**Network Architecture.** We take Mask R-CNN [12] with FPN [17] as the object detector. Following [11] and [15], to obtain pyramid feature maps for matching the requirements of FPN [17], whose feature maps are all with a stride of 16, we equally divide the backbone into 4 subsets, each consisting of a last global-window block and several local-

window blocks otherwise, and then apply convolutions to get the intermediate feature maps at different scales (stride 4, 8, 16, or 32), which is the same as ResNet [13].

**Training.** We perform end-to-end fine-tuning on COCO [18] for  $1 \times$  schedule, *i.e.*, 12 epochs, for ablations (*i.e.*, Tab. 6) with  $1024 \times 1024$  resolution. We simply follow the configuration of ViTDet [16] in detectron2 [24]. Experiments are conducted on 8 Tesla V100 GPUs with a batch size of 16.

## A.3. ADE20k Semantic Segmentation

**Network Architecture.** We take UperNet [25] as the segmentation decoder following the code of [1, 7, 15].

**Training.** Fine-tuning on ADE20k [28] for 80k iterations is performed for ablations. When compared with previous methods, 160k iterations of fine-tuning are performed. We adopt the exact same setting in mmsegmentation [7]. Specifically, each iteration consists of 16 images with  $512 \times 512$  resolution. The AdamW [19] optimizer is adopted with an initial learning rate of 1e-4 and a weight decay of 0.05 with ViT-B. For ViT-L, the learning rate is 2e-5. We apply a polynomial learning rate schedule with the first warmup of 1500 iterations following common practice [1, 7, 15]. Experiments are conducted on 8 Tesla V100 GPUs.

## B. More Experiments

**HPM over other baselines.** We

| method        | fine-tune                  |
|---------------|----------------------------|
| BEiT [1]      | 80.9                       |
| HPM (w/ BEiT) | <b>81.5</b> $\uparrow$ 0.6 |
| iBOT [29]     | 82.9                       |
| HPM (w/ iBOT) | <b>83.4</b> $\uparrow$ 0.5 |

We study the effectiveness of HPM over BEiT [1] and iBOT [29] in the right table. We perform 200 and 50 epochs pre-training for BEiT [1] and iBOT [29], respectively. Note that iBOT [29] utilizes 2 global crops ( $224^2$ ) and 10 local crops ( $96^2$ ). Therefore, the effective pre-training epoch of iBOT-based experiments is  $50 \times (2 + \frac{10 \times 96^2}{224^2}) \approx 200$ . From the table, we can tell that HPM brings consistent improvements.

**Ablations on decoder design.** Our decoder is a stack of Transformer blocks [23] with a fixed width following [11]. We study its depth and width in Tab. S4. 8 blocks with 512-d features is the best choice, which is exactly the same with MAE [11].

## C. Implementation of Easy-to-Hard Masking

Algorithm S1 shows the implementation of easy-to-hard mask generation introduced in Sec. 3.4. Specifically, at training epoch  $t$ , we want to generate a binary mask  $\mathbf{M}$  with  $\gamma N$  patches to be masked. Under the easy-to-hard manner, there are  $\alpha_t \gamma N$  patches masked by predicted loss  $\hat{\mathcal{L}}^t$  and the remaining  $(1 - \alpha_t) \gamma N$  are randomly selected.

---

**Algorithm S1** Pseudo-Code of Easy-to-Hard Masking.

---

```
# pred_t: predicted reconstruction loss
# t: current epoch
# T: total training epochs

# easy-to-hard mask generation
def mask_generation(pred_t, t, T, mask_ratio):
    L = len(pred_t)
    # total number of visible patches
    len_keep = int(L * (1 - mask_ratio))

    # number of patches masked by predicted loss
    alpha_t = alpha_0 + t/T * (alpha_T - alpha_0)
    len_pred = int(L * mask_ratio * alpha_t)
    ids_shuffle = argsort(pred_t)

    # compute remaining patches
    remain = delete(range(L) - ids_shuffle[-len_pred:])

    # random masking for remained patches
    ids_shuffle[:L-len_pred] = shuffle(remain)

    # generate mask: 0 is remove, 1 is keep
    mask = ones([L,1]).bool()
    mask[:len_keep] = 1

    # restore the mask
    ids_restore = argsort(ids_shuffle)
    return gather(mask, ids_restore)
```

---

## D. Hard to Reconstruct v.s. Discrimination

**Visual evidence.** We provide qualitative results on ImageNet-1K [21] validation set in Fig. S1 and COCO [18] validation set in Fig. S2, respectively. As illustrated in Figs. S1 and S2, patches with higher predicted reconstruction loss usually are more discriminative (*i.e.*, object or forehead).

**Quantitative evidence.** Here, we present a toy experiment to explore the relationship between *hard to reconstruct* and *discrimination for classification*. In the right table, three ViT-B/16 [9] models are trained from scratch on ImageNet-1K for 100 epochs under image-level supervision. Only 50% patches are input, and “bottom” and “top” indicates patches with lower and higher  $\mathcal{L}_{\text{pred}}$  are visible, respectively. We load HPM pre-trained with 200 epochs for computing  $\mathcal{L}_{\text{pred}}$ . Empirically, patches with higher  $\mathcal{L}_{\text{pred}}$  contribute more to classification. We hope this will inspire future work.

| input      | accuracy   |
|------------|------------|
| random 50% | 79.1       |
| bottom 50% | 78.7 ↓ 0.4 |
| top 50%    | 79.8 ↑ 0.7 |
| all 100%   | 80.9       |

## References

- [1] Hangbo Bao, Li Dong, and Furu Wei. Beit: Bert pre-training of image transformers. In *International Conference on Learning Representations (ICLR)*, 2022. 1, 2
- [2] Mathilde Caron, Ishan Misra, Julien Mairal, Priya Goyal, Piotr Bojanowski, and Armand Joulin. Unsupervised learning of visual features by contrasting cluster assignments. *Advances in Neural Information Processing Systems (NeurIPS)*, 2020. 1
- [3] Mathilde Caron, Hugo Touvron, Ishan Misra, Hervé Jégou, Julien Mairal, Piotr Bojanowski, and Armand Joulin. Emerging properties

- in self-supervised vision transformers. In *Proceedings of the IEEE/CVF International Conference on Computer Vision (ICCV)*, 2021. 1
- [4] Mark Chen, Alec Radford, Rewon Child, Jeffrey Wu, Heewoo Jun, David Luan, and Ilya Sutskever. Generative pretraining from pixels. In *International Conference on Machine Learning (ICML)*, 2020. 1
- [5] Xinlei Chen, Saining Xie, and Kaiming He. An empirical study of training self-supervised vision transformers. In *Proceedings of the IEEE/CVF International Conference on Computer Vision (ICCV)*, 2021. 1
- [6] Kevin Clark, Minh-Thang Luong, Quoc V Le, and Christopher D Manning. Electra: Pre-training text encoders as discriminators rather than generators. In *International Conference on Learning Representations (ICLR)*, 2020. 1, 2
- [7] MMSegmentation Contributors. MMSegmentation: Openmmlab semantic segmentation toolbox and benchmark. <https://github.com/open-mmlab/mms Segmentation>, 2020. 2
- [8] Ekin D Cubuk, Barret Zoph, Jonathon Shlens, and Quoc V Le. Randaugment: Practical automated data augmentation with a reduced search space. In *Proceedings of the IEEE/CVF Conference on Computer Vision and Pattern Recognition Workshop (CVPRW)*, 2020. 2
- [9] Alexey Dosovitskiy, Lucas Beyer, Alexander Kolesnikov, Dirk Weissenborn, Xiaohua Zhai, Thomas Unterthiner, Mostafa Dehghani, Matthias Minderer, Georg Heigold, Sylvain Gelly, et al. An image is worth 16x16 words: Transformers for image recognition at scale. In *International Conference on Learning Representations (ICLR)*, 2021. 1, 2, 3
- [10] Priya Goyal, Piotr Dollár, Ross Girshick, Pieter Noordhuis, Lukasz Wesolowski, Aapo Kyrola, Andrew Tulloch, Yangqing Jia, and Kaiming He. Accurate, large minibatch sgd: Training imagenet in 1 hour. *arXiv preprint arXiv:1706.02677*, 2017. 1
- [11] Kaiming He, Xinlei Chen, Saining Xie, Yanghao Li, Piotr Dollár, and Ross Girshick. Masked autoencoders are scalable vision learners. In *Proceedings of the IEEE/CVF Conference on Computer Vision and Pattern Recognition (CVPR)*, 2022. 1, 2
- [12] Kaiming He, Georgia Gkioxari, Piotr Dollár, and Ross Girshick. Mask r-cnn. In *Proceedings of the IEEE/CVF International Conference on Computer Vision (ICCV)*, 2017. 2
- [13] Kaiming He, Xiangyu Zhang, Shaoqing Ren, and Jian Sun. Deep residual learning for image recognition. In *Proceedings of the IEEE/CVF Conference on Computer Vision and Pattern Recognition (CVPR)*, 2016. 2
- [14] Gao Huang, Yu Sun, Zhuang Liu, Daniel Sedra, and Kilian Q Weinberger. Deep networks with stochastic depth. In *European Conference on Computer Vision (ECCV)*, 2016. 1, 2
- [15] Xiang Li, Wenhai Wang, Lingfeng Yang, and Jian Yang. Uniform masking: Enabling mae pre-training for pyramid-based vision transformers with locality. *arXiv preprint arXiv:2205.10063*, 2022. 1, 2
- [16] Yanghao Li, Saining Xie, Xinlei Chen, Piotr Dollár, Kaiming He, and Ross Girshick. Benchmarking detection transfer learning with vision transformers. *arXiv preprint arXiv:2111.11429*, 2021. 2
- [17] Tsung-Yi Lin, Piotr Dollár, Ross Girshick, Kaiming He, Bharath Hariharan, and Serge Belongie. Feature pyramid networks for object detection. In *Proceedings of the IEEE/CVF Conference on Computer Vision and Pattern Recognition (CVPR)*, 2017. 2
- [18] Tsung-Yi Lin, Michael Maire, Serge Belongie, James Hays, Pietro Perona, Deva Ramanan, Piotr Dollár, and C Lawrence Zitnick. Microsoft coco: Common objects in context. In *European Conference on Computer Vision (ECCV)*, 2014. 2, 3

- [19] Ilya Loshchilov and Frank Hutter. Decoupled weight decay regularization. *arXiv preprint arXiv:1711.05101*, 2017. [1](#), [2](#)
- [20] Ilya Loshchilov and Frank Hutter. Sgdr: Stochastic gradient descent with warm restarts. In *International Conference on Learning Representations (ICLR)*, 2017. [1](#), [2](#)
- [21] Olga Russakovsky, Jia Deng, Hao Su, Jonathan Krause, Sanjeev Satheesh, Sean Ma, Zhiheng Huang, Andrej Karpathy, Aditya Khosla, Michael Bernstein, et al. Imagenet large scale visual recognition challenge. *International Journal of Computer Vision (IJCV)*, 2015. [1](#), [2](#), [3](#)
- [22] Christian Szegedy, Vincent Vanhoucke, Sergey Ioffe, Jon Shlens, and Zbigniew Wojna. Rethinking the inception architecture for computer vision. In *Proceedings of the IEEE/CVF Conference on Computer Vision and Pattern Recognition (CVPR)*, 2016. [2](#)
- [23] Ashish Vaswani, Noam Shazeer, Niki Parmar, Jakob Uszkoreit, Llion Jones, Aidan N Gomez, Łukasz Kaiser, and Illia Polosukhin. Attention is all you need. *Advances in Neural Information Processing Systems (NeurIPS)*, 2017. [1](#), [2](#)
- [24] Yuxin Wu, Alexander Kirillov, Francisco Massa, Wan-Yen Lo, and Ross Girshick. Detectron2. <https://github.com/facebookresearch/detectron2>, 2019. [2](#)
- [25] Tete Xiao, Yingcheng Liu, Bolei Zhou, Yuning Jiang, and Jian Sun. Unified perceptual parsing for scene understanding. In *European Conference on Computer Vision (ECCV)*, 2018. [2](#)
- [26] Sangdoon Yun, Dongyoon Han, Seong Joon Oh, Sanghyuk Chun, Junsuk Choe, and Youngjoon Yoo. Cutmix: Regularization strategy to train strong classifiers with localizable features. In *Proceedings of the IEEE/CVF International Conference on Computer Vision (ICCV)*, 2019. [1](#), [2](#)
- [27] Hongyi Zhang, Moustapha Cisse, Yann N Dauphin, and David Lopez-Paz. Mixup: Beyond empirical risk minimization. In *International Conference on Learning Representations (ICLR)*, 2018. [1](#), [2](#)
- [28] Bolei Zhou, Hang Zhao, Xavier Puig, Sanja Fidler, Adela Barriuso, and Antonio Torralba. Scene parsing through ade20k dataset. In *Proceedings of the IEEE/CVF Conference on Computer Vision and Pattern Recognition (CVPR)*, 2017. [2](#)
- [29] Jinghao Zhou, Chen Wei, Huiyu Wang, Wei Shen, Cihang Xie, Alan Yuille, and Tao Kong. Image bert pre-training with online tokenizer. In *International Conference on Learning Representations (ICLR)*, 2022. [1](#), [2](#)

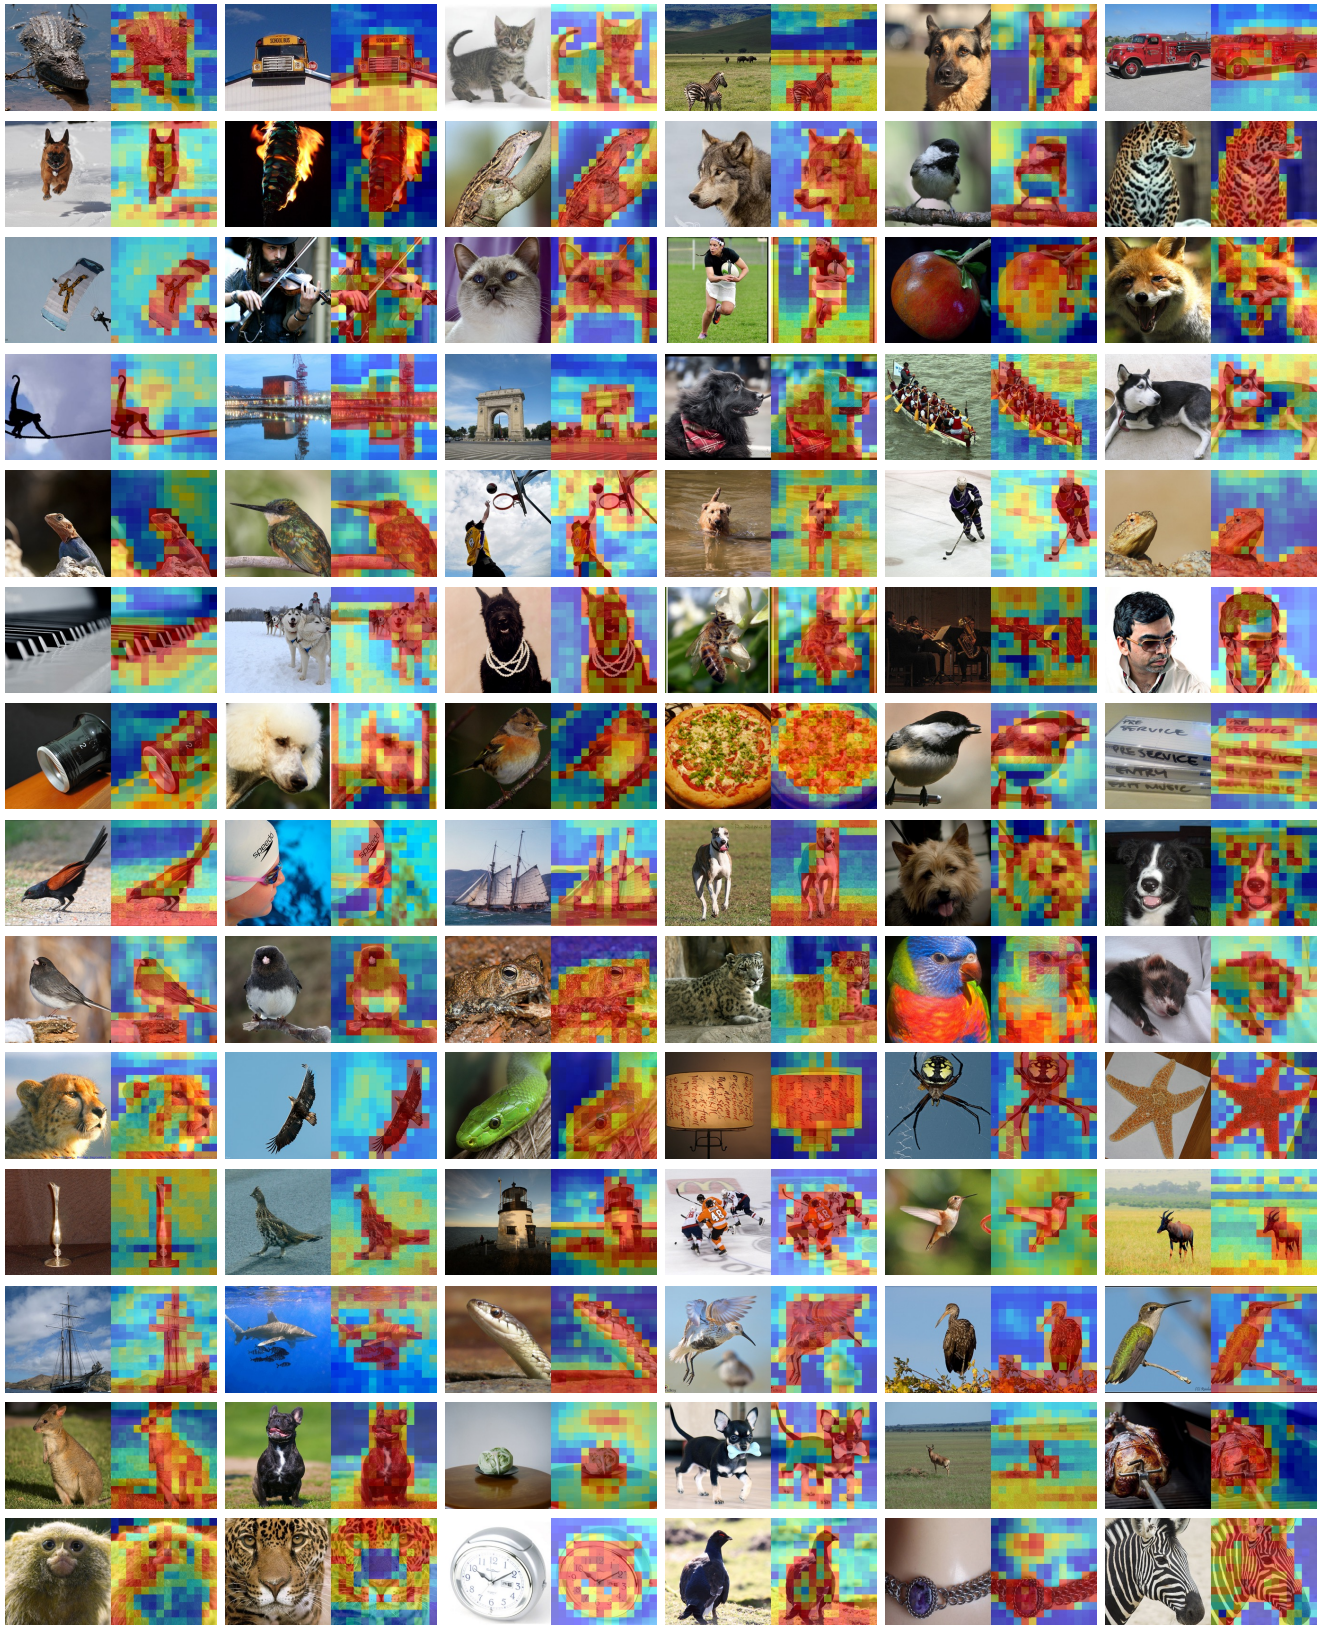

Figure S1. Qualitative results on **ImageNet-1K** validation set. For each tuple, we show the *input image* (left) and the patch-wise *predicted reconstruction loss* (right). Red means higher losses and blue indicates the opposite.

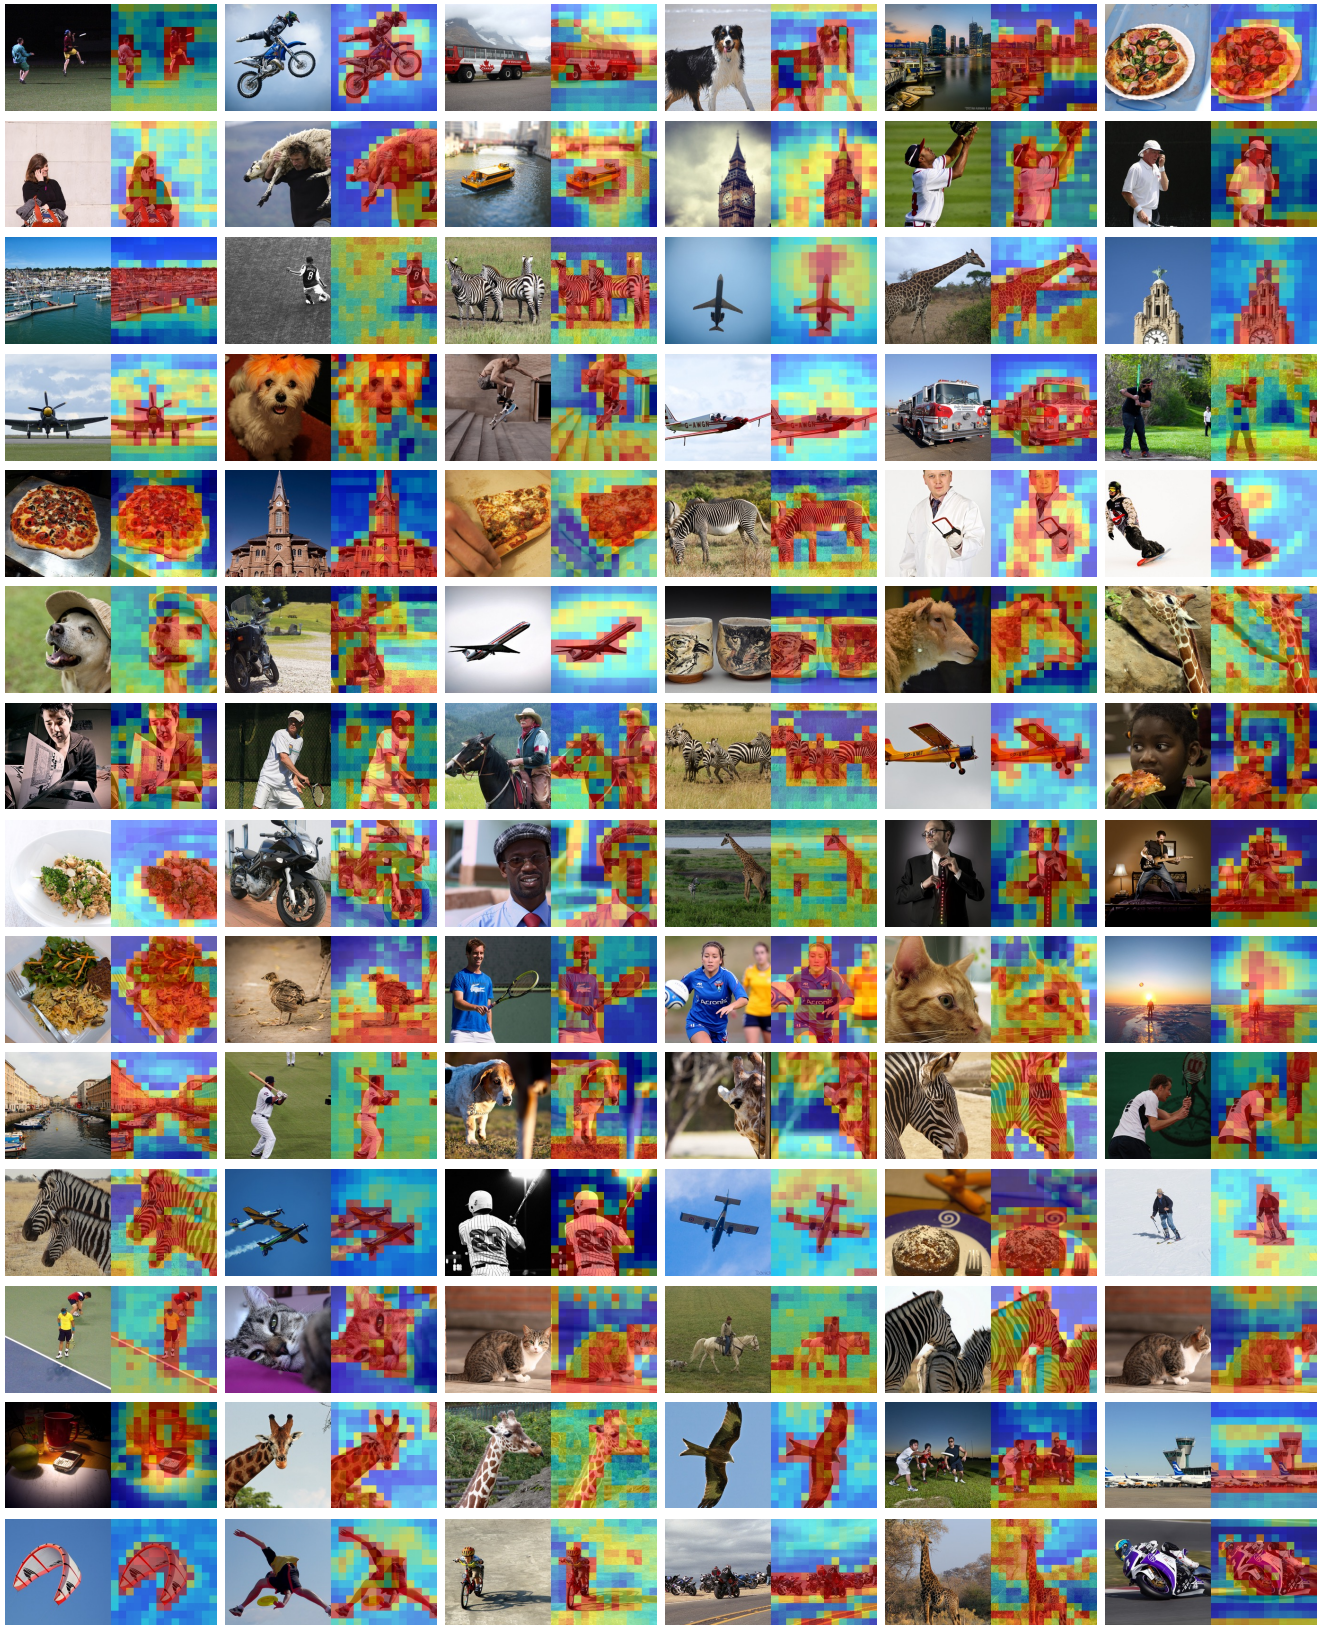

Figure S2. Qualitative results on **COCO** validation set. For each tuple, we show the *input image* (left) and the patch-wise *predicted reconstruction loss* (right). Red means higher losses and blue indicates the opposite.
